# Supplementary material for: Comprehensive Assessment of Pollution Sources and Health Impacts in Suburban Area of Shanghai
Source: MDPI journal article supplement (doi:10.3390/toxics11070552), 2023-06-23
Supplement: s1 [file s1]

*Supplementary Materials of*

# **Comprehensive Assessment of Pollution Sources and Health Impacts in Suburban Area of Shanghai**

**Wan Wei <sup>1</sup>, Meng Wang <sup>1,\*</sup>, Qi Yuan <sup>1</sup>, Zhuozhi Zhang <sup>1</sup>, Xinwei Li <sup>1</sup>, Shuwen Han <sup>1</sup>, Yusen Duan <sup>2</sup>, Qingyan Fu <sup>2</sup> and Shun-cheng Lee <sup>1,\*</sup>**

<sup>1</sup> Department of Civil and Environmental Engineering, The Hong Kong Polytechnic University, Kowloon, Hong Kong SAR, China;  
wanwei@polyu.edu.hk (W.W.); yq-qi.yuan@connect.polyu.hk (Q.Y.);  
zhuo-zhi.zhang@connect.polyu.hk (Z.Z.); xin-wei.li@connect.polyu.hk (X.L.);  
shuwen.han@connect.polyu.hk (S.H.)

<sup>2</sup> Shanghai Environmental Monitoring Center, Shanghai 200030, China;  
duanys@sheemc.cn (Y.D.);  
qingyanf@sheemc.cn (Q.F.)

\* Correspondence: meng-cee.wang@polyu.edu.hk (M.W.);  
shun-cheng.lee@polyu.edu.hk (S.C.L.)

**Table S1.** Data statistics of the 26 species included in ME-2 analysis (ng/m<sup>3</sup>).

| Species                       | Arithmetic mean | Median   | Minimum | Maximum  |
|-------------------------------|-----------------|----------|---------|----------|
| OC                            | 5157.16         | 4003.55  | 799.26  | 25420.03 |
| EC                            | 1676.05         | 1185.16  | 76.79   | 9073.63  |
| Si                            | 424.68          | 337.34   | 79.06   | 2694.00  |
| Ca                            | 130.90          | 75.98    | 0.04    | 1317.00  |
| Fe                            | 476.43          | 361.87   | 14.12   | 2953.00  |
| Cu                            | 16.33           | 10.82    | 1.65    | 415.26   |
| V                             | 2.18            | 1.09     | 0.12    | 18.33    |
| Cr                            | 6.89            | 3.90     | 0.02    | 147.15   |
| Mn                            | 42.73           | 31.62    | 0.09    | 292.29   |
| Ni                            | 4.69            | 3.61     | 0.25    | 38.02    |
| As                            | 9.02            | 6.55     | 0.10    | 119.54   |
| Cd                            | 5.65            | 5.26     | 1.01    | 22.24    |
| Ba                            | 28.03           | 20.48    | 0.33    | 279.67   |
| Pb                            | 33.86           | 25.45    | 1.05    | 856.70   |
| Hg                            | 2.67            | 2.23     | 0.04    | 71.01    |
| K <sup>+</sup>                | 275.90          | 207.00   | 20.00   | 2590.00  |
| SO <sub>4</sub> <sup>2-</sup> | 7804.04         | 6363.50  | 891.00  | 33353.00 |
| NO <sub>3</sub> <sup>-</sup>  | 15043.43        | 10464.00 | 480.00  | 74318.00 |
| ILCR(Cr)                      | 2.21            | 2.24     | 1.24    | 3.15     |
| HQ(Cr)                        | 7.08            | 6.44     | 1.94    | 38.80    |
| ILCR(Ni)                      | 1.61            | 1.61     | 1.36    | 1.93     |
| HQ(Ni)                        | 2.25            | 2.25     | 1.79    | 2.92     |
| ILCR(As)                      | 2.06            | 2.13     | 1.53    | 2.91     |
| HQ(As)                        | 4.20            | 4.25     | 2.39    | 9.18     |
| ILCR(Cd)                      | 1.93            | 1.93     | 1.70    | 2.20     |
| HQ(Cd)                        | 3.38            | 3.37     | 2.72    | 4.27     |

**Table S2.** ILCR and HQ value of four heavy metals in PM<sub>2.5</sub> in this study.

| Elements | HQ                    | Percentage | ILCR                  | Percentage |
|----------|-----------------------|------------|-----------------------|------------|
| Cr       | $4.85 \times 10^{-2}$ | 87.11%     | $5.83 \times 10^{-5}$ | 62.35%     |
| Ni       | $4.57 \times 10^{-5}$ | 0.08%      | $7.91 \times 10^{-7}$ | 0.85%      |
| As       | $6.00 \times 10^{-3}$ | 10.77%     | $2.73 \times 10^{-5}$ | 29.16%     |
| Cd       | $1.14 \times 10^{-3}$ | 2.04%      | $7.16 \times 10^{-6}$ | 7.65%      |
| Total    | $5.57 \times 10^{-2}$ | 100%       | $9.35 \times 10^{-5}$ | 100%       |

**Table S3.** Contribution of seven identified sources to ILCR and HQ and the contributions of the four elements to each source.

|                      | ILCR  |    |        | HQ    |    |        |
|----------------------|-------|----|--------|-------|----|--------|
| Secondary sources    | 1.0%  | Cr | 21.84% | 1.7%  | Cr | 14.02% |
|                      |       | Ni | 0.00%  |       | Ni | 0.00%  |
|                      |       | As | 59.98% |       | As | 63.00% |
|                      |       | Cd | 18.18% |       | Cd | 22.98% |
| Biomass burning      | 1.9%  | Cr | 6.58%  | 1.7%  | Cr | 0.00%  |
|                      |       | Ni | 30.92% |       | Ni | 34.08% |
|                      |       | As | 30.94% |       | As | 32.25% |
|                      |       | Cd | 31.56% |       | Cd | 33.67% |
| Traffic-related      | 8.1%  | Cr | 46.36% | 15.3% | Cr | 70.23% |
|                      |       | Ni | 25.93% |       | Ni | 16.28% |
|                      |       | As | 13.46% |       | As | 6.12%  |
|                      |       | Cd | 14.25% |       | Cd | 7.36%  |
| Industry-related     | 64.3% | Cr | 24.10% | 57.0% | Cr | 18.44% |
|                      |       | Ni | 25.27% |       | Ni | 27.66% |
|                      |       | As | 23.63% |       | As | 23.47% |
|                      |       | Cd | 27.00% |       | Cd | 30.43% |
| Heavy oil combustion | 10.8% | Cr | 21.52% | 9.7%  | Cr | 15.15% |
|                      |       | Ni | 29.31% |       | Ni | 34.21% |
|                      |       | As | 24.82% |       | As | 24.58% |
|                      |       | Cd | 24.35% |       | Cd | 26.06% |
| Coal combustion      | 13.8% | Cr | 22.64% | 14.2% | Cr | 13.75% |
|                      |       | Ni | 21.03% |       | Ni | 19.85% |
|                      |       | As | 35.16% |       | As | 47.11% |
|                      |       | Cd | 21.16% |       | Cd | 19.28% |
| Fugitive dust        | 0.2%  | Cr | 0.00%  | 0.4%  | Cr | 24.62% |
|                      |       | Ni | 9.63%  |       | Ni | 0.66%  |
|                      |       | As | 13.04% |       | As | 0.00%  |
|                      |       | Cd | 77.32% |       | Cd | 74.73% |

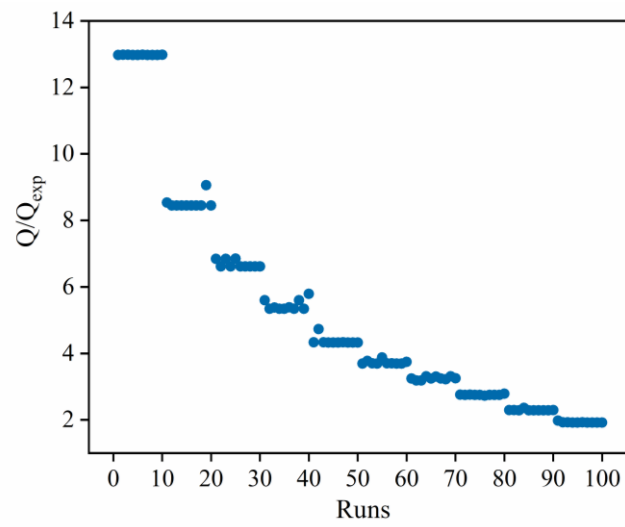

**Figure S1.** The variation of  $Q/Q_{\text{exp}}$  with the increase number of factors.

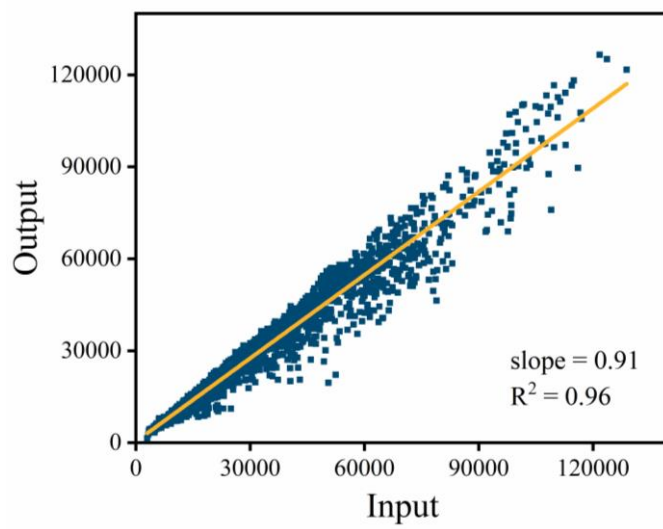

**Figure S2.** Scatterplot between the modeled output and the input values.

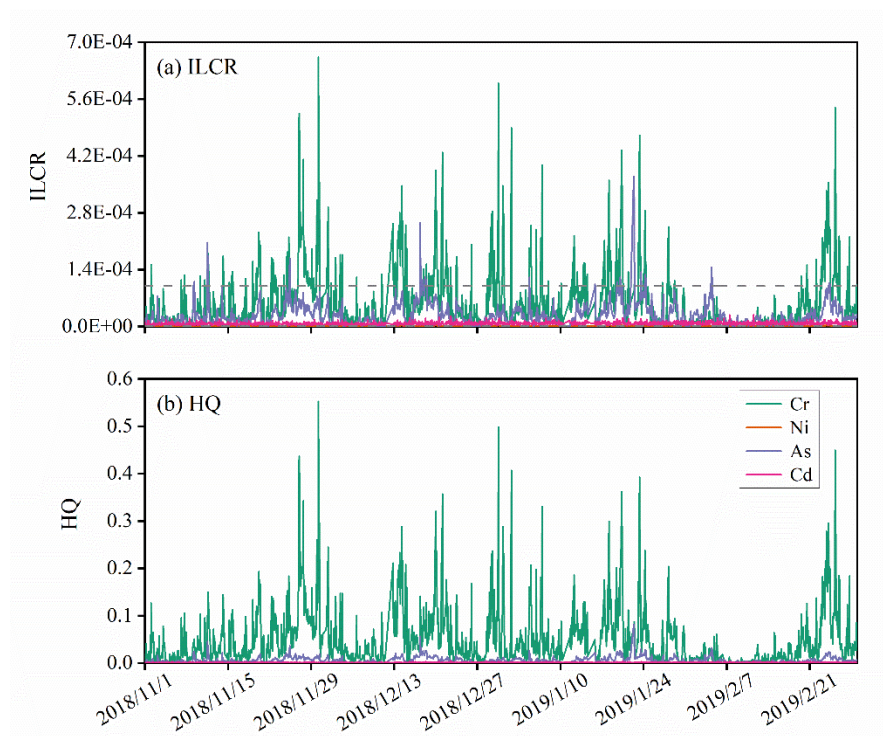

**Figure S3.** Temporal variations of HQ and ILCR. The two dotted lines in (a) represent the thresholds of  $10^{-4}$  and  $10^{-6}$ .

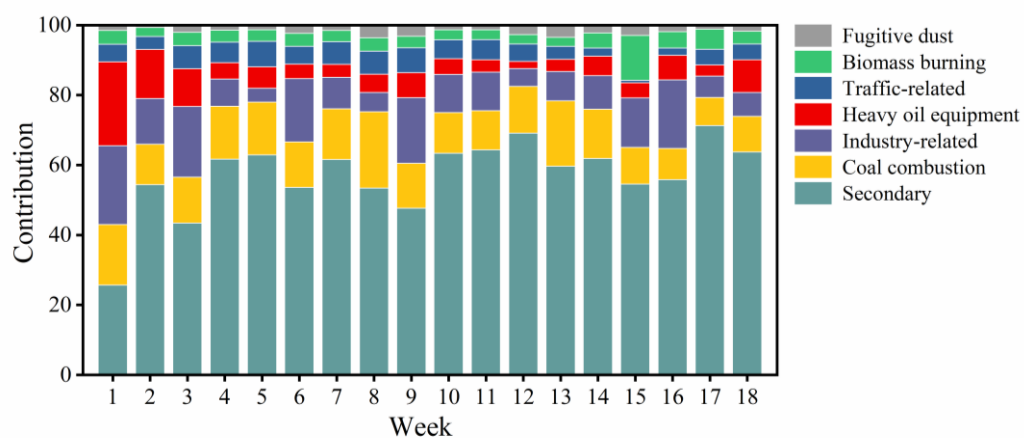

**Figure S4.** Contribution of different sources.
